# Supplementary material for: Impact of CYP3A5 Gene Polymorphisms on Tacrolimus Pharmacokinetics and Renal Allograft Rejection in Kidney Transplant Recipients: A Meta-Analysis Across Ethnic Populations
Source: Research Square preprint supplement (doi:10.21203/rs.3.rs-7490941/v1), 2025-09-15
Supplement: Supplementary file 1 [file 58ef62add35cad54cf905912.xlsx]

## Sheet: Sheet1
Author name	Year	PubMed ID	Population	Post Transplantation Timeline	Ref	Alt	n	Expresser	Non-expresser	Main Findings
								Rej/Total (%)	Rej/Total (%)
Chen et al. [ref. 17]	2009	PMID: 19545678	Asian	1-3 Months	38	29	67	10/38 (26.32%)	4/29 (13.79%)	Non-expressers showed lower rejection rates than expressers.
Cheng et al. [ref. 18]	2015	PMID: 26177012	Asian	1-3 Months	24	11	35	3/24 (12.50%)	1 /11 (9.09%)	Rejection rates were slightly lower in non-expressers.
Cho et al. [ref. 19]	2012	PMID: 22310591	Asian	1-2 Weeks	26	44	70	4/26 (15.38%)	4/44 (9.09%)	Rejection rates were slightly lower in non-expressers.
Ferraresso et al. [ref. 20]	2007	PMID: 17430486	European	12 Months	9	21	30	5/9 (55.56%)	4/21 (19.05%)	Expressers had significantly higher rejection rates.
Flahault et al. [ref. 21]	2016	PMID: 27977332	NR	1-3 Months, 12 Months	232	345	577	55/232 (23.71%)	95/345 (27.54%)	Non-expressers had slightly higher rejection rates.
Gervasini et al. [ref. 22]	2012	PMID: 22369694	European	12 Months	10	93	103	1/10 (10.00%)	15/93 (16.13%)	Slightly higher rejection rates in non-expressers.
Glowacki et al. [ref. 16]	2011	PMID: 21677300	European	1-3 Months	37	166	203	5/37 (13.51%)	17/166 (10.24%)	Non-expressers showed lower rejection rates.
Hesselink et al. [ref. 23]	2003	PMID: 12966368	European	12 Months	17	45	62	4/17 (23.53%)	9/45 (20.00%)	Rejection rates in expressers were slightly higher.
Hesselink et al. [ref. 24]	2008	PMID: 18334918	European	4,7 Months	26	110	136	2/26 (7.69%)	18/110 (16.36%)	Non-expressers showed higher rejection rates.
Kim et al. [ref. 41]	2012	PMID: 22183771	Asian	60 Months	52	77	129	6/52 (11.54%)	7/77 (9.09%)	Non-expressers had slightly lower rejection rates.
Kuypers et al. [ref. 25]	2007	PMID: 17495880	European	60 Months	15	80	95	3/15 (20.00%)	18/80 (22.50%)	Non-expressers showed higher rejection rates.
Kuypers et al. [ref. 26]	2010	PMID: 20526235	European	36-60 Months	52	252	304	10/52 (19.23%)	41/252 (16.27%)	Non-expressers had slightly lower rejection rates.
MacPhee et al. [ref. 15]	2005	PMID: 15729180	European	1-3 Months	56	122	178	23/56 (41.07%)	55/122 (45.08%)	Non-expressers had slightly higher rejection rates compared to expressers.
Min et al. [ref. 27]	2010	PMID: 21076384	Asian	12 Months	29	33	62	21/29 (72.41%)	17/33 (51.52%)	Significantly higher rejection rates in expressers.
Niioka et al. [ref. 28]	2017	PMID: 28271256	Asian	12 Months	97	123	220	43/97 (44.33%)	42/123 (34.15%)	Expressers had higher rejection rates.
Quteineh et al. [ref. 29]	2008	PMID: 19067682	European	36-60 Months	34	102	136	7/34 (20.59%)	12/102 (11.76%)	Non-expressers exhibited lower rejection rates.
Reininger et al. [ref. 39]	2023	PMID:36571802	Asian/African American/ American Indians/Caucasian	NR	23	55	78	0/23 (0.00%)	4/55 (7.27%)	Rejections occurred exclusively in non-expressers.
Ro et al. [ref. 30]	2012	PMID: 23149441	Asian	12 Months	111	138	249	17/111 (15.32%)	16/138 (11.59%)	Lower rejection rates observed in non-expressers.
Roy et al. [ref. 31]	2006	PMID: 16906020	European	1-3 Months	9	35	44	3/9 (33.33%)	8/35 (22.86%)	Expressers had higher rejection rates.
Santoro et al. [ref. 32]	2011	PMID: 21806386	European	1-3 Months	62	91	153	7/62 (11.29%)	8/91 (8.79%)	Lower rejection rates in non-expressers.
Satoh et al. [ref. 33]	2009	PMID: 19125240	Asian	1-3 Months	19	22	41	3/19 (15.79%)	8/22 (36.36%)	Non-expressers had significantly higher rejection rates.
Singh et al. [ref. 34]	2009	PMID: 19343327	Asian	36-60 Months	36	37	73	17/36 (47.22%)	10/37 (27.03%)	Expressers exhibited higher rejection rates.
Tirelli et al. [ref. 35]	2008	PMID: 18443548	European	12 Months	8	19	27	4/8 (50.00%)	3/19 (15.79%)	Higher rejection rates in expressers.
Wang et al. [ref. 36]	2010	PMID: 21047202	European	NR	39	69	108	3/39 (7.69%)	11/69 (15.94%)	Non-expressers demonstrated higher rejection rates.
Warzyszyńska et al. [ref. 38]	2022	PMID:35879888	European	NR	14	81	95	2/14 (14.29%)	23/81 (28.40%)	Non-expressers showed higher rejection rates.
Xuan et al. [ref. 40]	2020	PMID:36085176	Vietnamese	NR	28	40	68	2/28 (7.14%)	2/40 (5.00%)	Non-expressers showed lower rejection rates.
Yaowakulpatana et al. [ref. 37]	2016	PMID: 26635230	NR	1-2 Weeks	83	81	164	5/83 (6.02%)	6/81 (7.41%)	Rejection rates were slightly higher in non-expressers.
