# Supplementary material for: Impact of CYP3A5 Gene Polymorphisms on Tacrolimus Pharmacokinetics and Renal Allograft Rejection in Kidney Transplant Recipients: A Meta-Analysis Across Ethnic Populations
Source: Research Square preprint supplement (doi:10.21203/rs.3.rs-7490941/v1), 2025-09-15
Supplement: Supplementary file 2 [file 65984c59befcfc5fb3e1fe3f.xlsx]

## Sheet: Sheet1
Author name	Year	PubMed ID	Population	Ref	Alt	n	Post Transplantation Timeline	Main Findings
Chandel et al. [ref. 58]	2009	PMID: 19384264	Indian, Asian	32	47	79	Month 1,3	Non-expressers showed consistently higher Co/D ratios at Months 1 and 3.
Chen et al. [ref. 17]	2009	PMID: 19545678	Asian	38	29	67	Week 1, Month 1,3,6,12	Non-expressers consistently showed higher tacrolimus concentration-dose ratios across all time intervals.
Cho et al. [ref. 19]	2012	PMID: 22310591	Asian	26	44	70	Week 3, Month 1,3,6,12	Non-expressers had elevated Co/D ratios from Week 3 to Month 12.
De Wildt et al. [ref. 53]	2011	PMID: 21698374	European	16	28	44	Week 2	Higher Co/D ratios observed in non-expressers at Week 2.
den Jonge et al. [ref. 60]	2012	PMID: 22871995	European	10	49	59	Month 3	Higher Co/D ratios observed in non-expressers at Month 3.
Ferraresso et al. [ref. 46]	2011	PMID: 21851254	European	21	8	29	Week 1, Month 6	Non-expressers had higher Co/D ratios at Week 1 and Month 6.
Ferraris et al. [ref. 64]	2011	PMID: 21711429	Caucasian	10	38	48	Month 12	Non-expressers showed significantly higher Co/D ratios at Month 12.
Galiana et al. [ref. 47]	2012	DOI: 10.5772/26325	European	31	136	167	Week 1	Non-expressers showed slightly higher Co/D ratios at Week 1.
Gervasini et al. [ref. 22]	2012	PMID: 22369694	European	10	93	103	Week 1,3, Month 1,6, 12	Non-expressers consistently had higher Co/D ratios from Week 1 to Month 12.
Glowacki et al. [ref. 16]	2011	PMID: 21677300	European	37	166	203	Week 2,3, Month 1,3,12	Non-expressers consistently showed higher Co/D ratios from Week 2 to Month 12.
Hesselink et al. [ref. 23]	2003	PMID: 12966368	European	17	45	62	Month 3,12	Non-expressers exhibited elevated Co/D ratios at Months 3 and 12.
Hirano et al. [ref. 62]	2012	PMID: 22889968	Asian	18	32	50	Month 6	Higher Co/D ratios observed in non-expressers at Month 6.
Jun et al. [ref. 61]	2009	PMID: 19384171	Asian	69	101	170	Month 6	Non-expressers showed elevated Co/D ratios at Month 6.
Kim et al. [ref. 41]	2012	PMID: 22183771	Asian	52	77	129	Month 12	Higher Co/D ratios observed in non-expressers at Month 12.
Kurzawski et al. [ref. 48]	2014	PMID: 24444408	European	11	127	138	Week 1	Non-expressers showed significantly higher Co/D ratios at Week 1.
Li et al. [ref. 42]	2011	PMID: 21331500	Asian	76	66	142	Week 2	Non-expressers displayed elevated Co/D ratios compared to expressers.
Li et al. [ref. 43]	2011	PMID: 20514078	Asian	21	15	36	Week 1	Non-expressers exhibited higher Co/D ratios compared to expressers.
Loh et al. [ref. 59]	2008	PMID: 18589174	Asian (78%), Malay (16%), Indian (5%)	8	10	18	Month 3	Non-expressers had elevated Co/D ratios at Month 3.
Min et al. [ref. 27]	2010	PMID: 21076384	Asian	29	33	62	Week 1	Non-expressers displayed higher Co/D ratios than expressers at Week 1.
Miura et al. [ref. 55]	2009	PMID: 19730841	Asian	53	45	98	Week 3, Month 1	Non-expressers displayed higher Co/D ratios at Week 3 and Month 1.
Mourad et al. [ref. 49]	2006	PMID: 17032130	European	10	49	59	Week 1	Non-expressers had higher ratios compared to expressers at Week 1.
Op den Buijsch et al. [ref. 54]	2007	PMID: 17635182	European	10	16	26	Week 2	Non-expressers exhibited much higher Co/D ratios at Week 2.
Provenzani et al. [ref. 56]	2011	PMID: 21076384	European	5	45	50	Week 3, Month 1,3,6	Non-expressers consistently showed higher Co/D ratios from Week 3 to Month 6.
Quteineh et al. [ref. 29]	2008	PMID: 19067682	Asian	34	102	136	Month 1,6,12	Higher Co/D ratios in non-expressers from Month 1 to Month 12.
Ro et al. [ref. 30]	2012	PMID: 23149441	Asian	111	138	249	Month 6, 12	Non-expressers consistently displayed higher Co/D ratios at Months 6 and 12.
Singh et al. [ref. 34]	2009	PMID: 19343327	European	31	42	73	Week 3, Month 1,3	Higher Co/D ratios observed in non-expressers from Week 3 to Month 3.
Sireen et al. [ref. 52]	2013	PMID: 24231473	Asian	2	32	34	Week 2	Non-expressers displayed higher Co/D ratios at Week 2.
Tavira et al. [ref. 50]	2011	PMID: 21480817	European	80	320	400	Week 1, Month 6,12	Higher Co/D ratios observed in non-expressers across all intervals.
Thervet et al. [ref. 57]	2003	PMID: 14578760	European	13	67	80	Week 3, Month 1	Non-expressers had elevated Co/D ratios at Week 3 and Month 1.
Tirelli et al. [ref. 35]	2008	PMID: 18443548	European	7	19	26	Week 1,2,3, Month 1,3,6,12	Non-expressers consistently exhibited higher Co/D ratios from Week 1 to Month 12.
Turolo et al. [ref. 51]	2010	PMID: 21273673	European	6	20	26	Week 1,3, Month 1	Non-expressers had elevated Co/D ratios across all intervals from Week 1 to Month 1.
Zhang et al. [ref. 44]	2005	PMID: 16146556	Asian	48	70	118	Week 1,3, Month 1,3	Non-expressers showed elevated Co/D ratios across Weeks 1, 3, Months 1 and Month 3.
Zhang et al. [ref. 45]	2010	PMID: 21094797	Asian	15	13	28	Week 1,2	Higher Co/D ratios observed in non-expressers in Weeks 1 and 2.
Zhao et al. [ref. 63]	2005	PMID: 15808586	Asian	11	19	30	Month 3,6,12	Non-expressers had higher Co/D ratios at Months 3, 6, and 12.
